# Supplementary material for: Association Between Ambient Fine Particulate Matter and Maternal Vitamin D Levels During The Second Trimester of Pregnancy
Source: Research Square preprint supplement (doi:10.21203/rs.3.rs-1342874/v1), 2022-02-14
Supplement: Supplementary file 1 [file 138c1e99c1c9134ed08a9120.docx]

Table S2. Associations of the cumulative effectsa of PM (continuous) and maternal serum 25OHD levels during the second trimester

| Exposure | Adjust Ib | | Adjust IIc | |
| --- | --- | --- | --- | --- |
| β (95% CI) | *P*-value | β (95% CI) | *P*-value |
| PM2.5 lag days, d |  |  |  |  |
| 0-3 | -0.077 (-0.082, -0.073) | <0.00001 | -0.018 (-0.023, -0.013) | <0.00001 |
| 0-7 | -0.122 (-0.127, -0.116) | <0.00001 | -0.037 (-0.044, -0.031) | <0.00001 |
| 0-15 | -0.164 (-0.169, -0.158) | <0.00001 | -0.068 (-0.077, -0.059) | <0.00001 |
| 0-30 | -0.196 (-0.203, -0.190) | <0.00001 | -0.103 (-0.114, -0.092) | <0.00001 |
| 0-45 | -0.210 (-0.217, -0.203) | <0.00001 | -0.113 (-0.125, -0.101) | <0.00001 |
| 0-60 | -0.216 (-0.223, -0.209) | <0.00001 | -0.108 (-0.120, -0.096) | <0.00001 |
| 0-75 | -0.164 (-0.169, -0.158) | <0.00001 | -0.068 (-0.077, -0.059) | <0.00001 |
| 0-90 | -0.216 (-0.223, -0.208) | <0.00001 | -0.104 (-0.117, -0.092) | <0.00001 |
| PM10 lag days, d |  |  |  |  |
| 0-3 | -0.052 (-0.055, -0.049) | <0.00001 | -0.012 (-0.016, -0.009) | <0.00001 |
| 0-7 | -0.082 (-0.086, -0.079) | <0.00001 | -0.026 (-0.030, -0.021) | <0.00001 |
| 0-15 | -0.115 (-0.119, -0.111) | <0.00001 | -0.051 (-0.057, -0.046) | <0.00001 |
| 0-30 | -0.140 (-0.145, -0.136) | <0.00001 | -0.078 (-0.085, -0.071) | <0.00001 |
| 0-45 | -0.151 (-0.155, -0.146) | <0.00001 | -0.088 (-0.097, -0.080) | <0.00001 |
| 0-60 | -0.156 (-0.161, -0.151) | <0.00001 | -0.090 (-0.099, -0.081) | <0.00001 |
| 0-75 | -0.115 (-0.119, -0.111) | <0.00001 | -0.051 (-0.057, -0.046) | <0.00001 |
| 0-90 | -0.153 (-0.159, -0.148) | <0.00001 | -0.083 (-0.092, -0.074) | <0.00001 |

aCumulative effects of PM were calculated as a continuous variable.

bAdjusted for year and age.

cAdjusted for year, age and season.

Abbreviations: PM, particulate matter; PM2.5, particulate matter with an aerodynamic diameter of ≤2.5 μm; PM10, particulate matter with an aerodynamic diameter of ≤10 μm; 25OHD, 25-hydroxy vitamin D; CI, confidence interval.
