# Supplementary material for: Association Between Ambient Fine Particulate Matter and Maternal Vitamin D Levels During The Second Trimester of Pregnancy
Source: Research Square preprint supplement (doi:10.21203/rs.3.rs-1342874/v1), 2022-02-14
Supplement: Supplementary file 2 [file 24d75bf48b32fdc05c09ba59.docx]

Table S6. Threshold effect analysis examining associations between 60-day moving daily average PM10 levels and maternal serum 25OHD levels during second trimester in subgroups stratified by age

|  | Age ≤25 | Age >25 | Total |
| --- | --- | --- | --- |
| Model Aa |  |  | *P*-interaction: 0.045 |
| One line slope, β (95%CI) *P*-value | -0.044 (-0.067, -0.021) 0.0002 | -0.038 (-0.050, -0.026) <0.0001 | -0.039 (-0.050, -0.028) <0.0001 |
| Model Bb |  |  | *P*-interaction: 0.038 |
| Turning point (K), μg/m3 | 38.1 | 38.3 | 38.28 |
| < K, β (95%CI) *P*-value | -0.548 (-0.841, -0.256) 0.0002 | -0.757 (-0.904, -0.610) <0.0001 | -0.711 (-0.842, -0.581) <0.0001 |
| > K, β (95%CI) *P*-value | -0.043 (-0.066, -0.021) 0.0002 | -0.037 (-0.050, -0.025) <0.0001 | -0.038 (-0.049, -0.027) <0.0001 |
| Slope 2 – Slope 1, β (95%CI) *P*-value | 0.505 (0.213, 0.797) 0.0007 | 0.719 (0.573, 0.866) <0.0001 | 0.673 (0.543, 0.803) <0.0001 |
| Predicted 25OHD levels at K (95% CI), ng/mL | 20.345 (20.006, 20.685) | 21.110 (20.927, 21.293) | 20.950 (20.789, 21.112) |
| LRTc, *P*-value | <0.001 | <0.001 | <0.001 |

Adjusted for year, season, 60-day moving daily average atmospheric pressure, sunshine duration, relative humidity and wind speed.

aLinear analysis, *P*-value <0.05 indicates a linear relationship.

bNon-linear analysis.

c*P* <0.05 means Model B is significantly different from Model A, which indicates a non-linear relationship.

Abbreviations: PM10, particulate matter with an aerodynamic diameter of ≤10 μm; 25OHD, 25-hydroxy vitamin D; CI, confidence interval; LRT, logarithmic likelihood ratio test.
