# Supplementary material for: Association Between Ambient Fine Particulate Matter and Maternal Vitamin D Levels During The Second Trimester of Pregnancy
Source: Research Square preprint supplement (doi:10.21203/rs.3.rs-1342874/v1), 2022-02-14
Supplement: Supplementary file 3 [file 2e894f91ecf3de4c89e66185.docx]

Table S5. Threshold effect analysis examining associations between 45-day moving daily average PM2.5 levels and maternal serum 25OHD levels during second trimester in subgroups stratified by age

|  | Age ≤25 | Age >25 | Total |
| --- | --- | --- | --- |
| Model Aa |  |  | *P*-interaction: 0.083 |
| One line slope, β (95%CI) *P*-value | -0.038 (-0.067, -0.009) 0.0101 | -0.032 (-0.048, -0.016) <0.0001 | -0.033 (-0.047, -0.019) <0.0001 |
| Model Bb |  |  | *P*-interaction: 0.058 |
| Turning point (K), μg/m3 | 19.98 | 20.11 | 20.07 |
| < K, β (95%CI) *P*-value | -1.536 (-2.100, -0.972) <0.0001 | -1.864 (-2.165, -1.564) <0.0001 | -1.792 (-2.059, -1.526) <0.0001 |
| > K, β (95%CI) *P*-value | -0.031 (-0.060, -0.002) 0.0354 | -0.021 (-0.037, -0.005) 0.0106 | -0.023 (-0.037, -0.009) 0.0014 |
| Slope 2 – Slope 1, β (95%CI) *P*-value | 1.505 (0.939, 2.070) <0.0001 | 1.843 (1.541, 2.145) <0.0001 | 1.769 (1.502, 2.037) <0.0001 |
| Predicted 25OHD levels at K (95% CI), ng/mL | 19.944 (19.635, 20.252) | 20.809 (20.642, 20.976) | 20.635 (20.488, 20.782) |
| LRTc, *P*-value | <0.001 | <0.001 | <0.001 |

Adjusted for year, season, 45-day moving daily average atmospheric pressure, sunshine duration, relative humidity and wind speed.

aLinear analysis, *P*-value <0.05 indicates a linear relationship.

bNon-linear analysis.

c*P* < 0.05 means Model B is significantly different from Model A, which indicates a non-linear relationship.

Abbreviations: PM2.5, particulate matter with an aerodynamic diameter of ≤2.5 μm; 25OHD, 25-hydroxy vitamin D; CI, confidence interval; LRT, logarithmic likelihood ratio test.
