# Supplementary material for: Association Between Ambient Fine Particulate Matter and Maternal Vitamin D Levels During The Second Trimester of Pregnancy
Source: Research Square preprint supplement (doi:10.21203/rs.3.rs-1342874/v1), 2022-02-14
Supplement: Supplementary file 4 [file 9a83d2afea35181543353562.docx]

Table S3. Associations between particulate matter exposure and risk of maternal vitamin D deficiency and inadequacy (<20 ng/mL)

| Model | ORf (95% CI)  *P*-value | |
| --- | --- | --- |
| 45-day moving daily average PM2.5 concentration | 60-day moving daily average PM10 concentration |
| Crude Modela | 1.661 (1.624, 1.700) <0.00001 | 1.397 (1.376, 1.418) <0.00001 |
| Model 1 (Age + Year + Season)b | 1.387 (1.330, 1.447) <0.00001 | 1.259 (1.225, 1.295) <0.00001 |
| Model 2 (Model 1 + Atmospheric Pressure)c | 1.142 (1.090, 1.196) <0.00001 | 1.103 (1.069, 1.138) <0.00001 |
| Model 3 (Model 2 + Sunshine Duration)d | 1.135 (1.084, 1.189) <0.00001 | 1.123 (1.087, 1.159) <0.00001 |
| Model 4 (Model 3 + Relative Humidity +Wind Speed)e | 1.124 (1.071, 1.180) <0.00001 | 1.113 (1.074, 1.153) <0.00001 |

aNo adjusted.

bAdjusted for year, age and season.

cAdjusted for year, age, season and the corresponding-day moving daily average atmospheric pressure.

dAdjusted for year, age, season, the corresponding-day moving daily average atmospheric pressure and sunshine duration.

eAdjusted for year, age, season, the corresponding-day moving daily average atmospheric pressure, sunshine duration, relative humidity and wind speed.

fOR and 95% CI was calculated on basis of a 10 mg/m3 increase in PM2.5 or PM10 exposure.

Abbreviations: PM, particulate matter; PM2.5, particulate matter with an aerodynamic diameter of ≤2.5 μm; PM10, particulate matter with an aerodynamic diameter of ≤10 μm; 25-hydroxy vitamin D; OR, odds ratio; CI, confidence interval.
