# Supplementary material for: Association Between Ambient Fine Particulate Matter and Maternal Vitamin D Levels During The Second Trimester of Pregnancy
Source: Research Square preprint supplement (doi:10.21203/rs.3.rs-1342874/v1), 2022-02-14
Supplement: Supplementary file 5 [file d5402a79849cf59a981862b9.docx]

Table S1. Associations of cumulative effectsa of PM(quartiles) and maternal serum 25OHD levels during second trimester

| Exposure | Adjust Ib | | Adjust IIc | |
| --- | --- | --- | --- | --- |
| β (95% CI) | *P*-value | β (95% CI) | *P*-value |
| PM2.5 lag days, d |  |  |  |  |
| 0-3 | -0.116 (-0.122, -0.110) | <0.00001 | -0.031 (-0.038, -0.024) | <0.00001 |
| 0-7 | -0.170 (-0.177, -0.163) | <0.00001 | -0.054 (-0.063, -0.045) | <0.00001 |
| 0-15 | -0.197 (-0.204, -0.190) | <0.00001 | -0.079 (-0.089, -0.068) | <0.00001 |
| 0-30 | -0.230 (-0.238, -0.222) | <0.00001 | -0.105 (-0.118, -0.092) | <0.00001 |
| 0-45 | **-0.236 (-0.244, -0.228)** | **<0.00001** | **-0.109 (-0.123, -0.096)** | **<0.00001** |
| 0-60 | -0.225 (-0.233, -0.217) | <0.00001 | -0.078 (-0.091, -0.064) | <0.00001 |
| 0-75 | -0.197 (-0.204, -0.190) | <0.00001 | -0.079 (-0.089, -0.068) | <0.00001 |
| 0-90 | -0.224 (-0.233, -0.216) | <0.00001 | -0.077 (-0.091, -0.063) | <0.00001 |
| PM10 lag days, d |  |  |  |  |
| 0-3 | -0.069 (-0.072, -0.065) | <0.00001 | -0.018 (-0.022, -0.014) | <0.00001 |
| 0-7 | -0.098 (-0.103, -0.094) | <0.00001 | -0.032 (-0.037, -0.026) | <0.00001 |
| 0-15 | -0.133 (-0.138, -0.128) | <0.00001 | -0.058 (-0.065, -0.052) | <0.00001 |
| 0-30 | -0.151 (-0.156, -0.146) | <0.00001 | -0.077 (-0.085, -0.070) | <0.00001 |
| 0-45 | -0.156 (-0.161, -0.151) | <0.00001 | -0.074 (-0.083, -0.065) | <0.00001 |
| 0-60 | **-0.165 (-0.170, -0.159)** | **<0.00001** | **-0.081 (-0.091, -0.072)** | **<0.00001** |
| 0-75 | -0.133 (-0.138, -0.128) | <0.00001 | -0.058 (-0.065, -0.052) | <0.00001 |
| 0-90 | -0.160 (-0.166, -0.154) | <0.00001 | -0.073 (-0.083, -0.064) | <0.00001 |

aCumulative effects of PM2.5/PM10 were divided into four levels based on quartiles, and estimates were calculated based on group trends.

bAdjusted for year and age.

cAdjusted for year, age and season.

Abbreviations: PM, particulate matter; PM2.5, particulate matter with an aerodynamic diameter of ≤2.5 μm; PM10, particulate matter with an aerodynamic diameter of ≤10 μm; 25OHD, 25-hydroxy vitamin D; CI, confidence interval.
