# Supplementary material for: Association Between Ambient Fine Particulate Matter and Maternal Vitamin D Levels During The Second Trimester of Pregnancy
Source: Research Square preprint supplement (doi:10.21203/rs.3.rs-1342874/v1), 2022-02-14
Supplement: Supplementary file 6 [file ecda10bd33fb4d54d6d3f05c.docx]

Table S4. Threshold effect analysis examining associations between maternal age and serum 25OHD levels during second trimester in different models

|  | Model Id | Model IIe | Model IIIf | Model IVg |
| --- | --- | --- | --- | --- |
| Model Aa |  |  |  |  |
| One line slope, β (95%CI) *P*-value | 0.08 (0.06, 0.10) <0.0001 | 0.08 (0.06, 0.10) <0.0001 | 0.08 (0.06, 0.10) <0.0001 | 0.08 (0.06, 0.10) <0.0001 |
| Model Bb |  |  |  |  |
| Turning point (K), years | 25 | 25 | 25 | 25 |
| < K, β (95%CI) *P*-value | 0.23 (0.13, 0.32) <0.0001 | 0.22 (0.13, 0.31) <0.0001 | 0.21 (0.12, 0.31) <0.0001 | 0.22 (0.13, 0.31) <0.0001 |
| > K, β (95%CI) *P*-value | 0.06 (0.03, 0.08) <0.0001 | 0.06 (0.03, 0.08) <0.0001 | 0.06 (0.03, 0.08) <0.0001 | 0.06 (0.04, 0.08) <0.0001 |
| Slope 2 – Slope 1, β (95%CI) *P*-value | -0.17 (-0.27, -0.06) 0.0017 | -0.16 (-0.26, -0.06) 0.0022 | -0.16 (-0.26, -0.05) 0.0037 | -0.16 (-0.26, -0.06) 0.0024 |
| Predicted 25OHD levels at K (95% CI), ng/mL | 17.36 (17.21, 17.52) | 17.36 (17.21, 17.52) | 17.36 (17.21, 17.52) | 17.36 (17.21, 17.52) |
| LRTc, *P*-value | 0.002 | 0.002 | 0.004 | 0.002 |

aLinear analysis, *P*-value < 0.05 indicates a linear relationship.

bNon-linear analysis.

c*P* < 0.05 means Model B is significantly different from Model A, which indicates a non-linear relationship.

dAdjusted for year and 45-day moving daily average PM2.5 level.

eAdjusted for year, season, 45-day moving daily average PM2.5 level, daily average atmospheric pressure, sunshine duration, relative humidity and wind speed.

fAdjusted for year and 60-day moving daily average PM10 level.

gAdjusted for year, season, 60-day moving daily average PM10 level, daily average atmospheric pressure, sunshine duration, relative humidity and wind speed.

Abbreviations: PM2.5, particulate matter with an aerodynamic diameter of ≤2.5 μm; PM10, particulate matter with an aerodynamic diameter of ≤10 μm; 25OHD, 25-hydroxy vitamin D; CI, confidence interval; LRT, logarithmic likelihood ratio test.
